# Supplementary material
Source: PubMed Central journal article supplement (PMC9134042)
Supplement: jamasurg-e221554-s001.pdf [file jamasurg-e221554-s001.pdf]

## Supplemental Online Content

Writing Group for the CODA Collaborative. Self-selection vs randomized assignment of treatment for appendicitis. *JAMA Surg*. Published online May 25, 2022.  
doi:10.1001/jamasurg.2022.1554

**eFigure.** Study Recruitment Diagram

**eTable 1.** Additional Baseline Participant Characteristics—Observational vs Randomized Clinical Trial Cohort

**eTable 2.** Baseline Randomized Clinical Trial Participant Characteristics by Arm

**eAppendix 1.** Analysis Comparing Odds of Appendectomy Between the Observational Cohort And Contemporaneous RCT Cohort

**eAppendix 2.** The CODA Trial Sites and Site Leads

This supplemental material has been provided by the authors to give readers additional information about their work.

**eFigure. Study Recruitment Diagram**

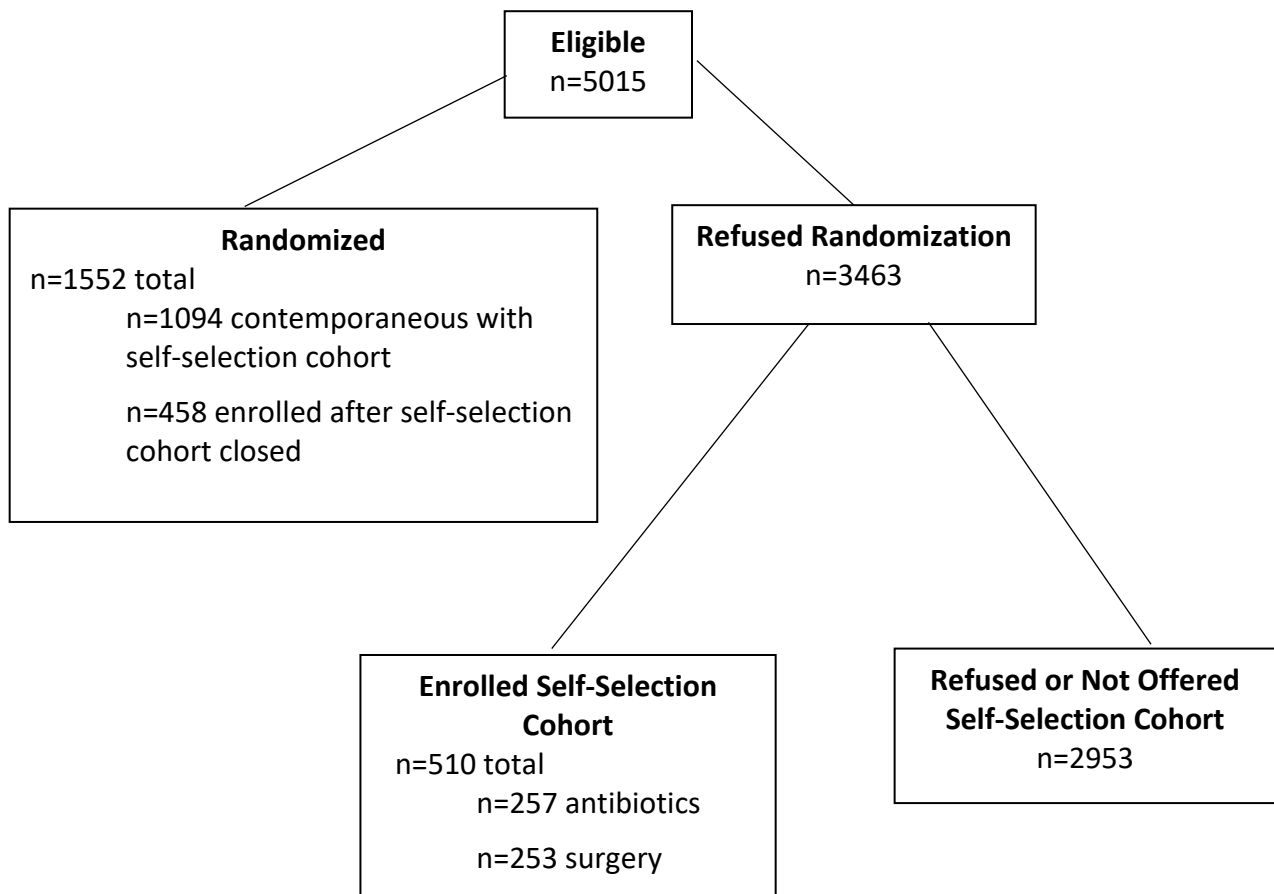

**eTable 1: Additional Baseline Participant Characteristics—Observational vs Randomized Clinical Trial Cohort\***

|                                                           | <b>RCT subset<sup>+</sup></b> | <b>All Observational</b> | <b>Observational-<br/>antibiotics</b> | <b>Observational-<br/>appendectomy</b> |
|-----------------------------------------------------------|-------------------------------|--------------------------|---------------------------------------|----------------------------------------|
|                                                           | <b>(n= 1094)</b>              | <b>(n= 510)</b>          | <b>(n= 257)</b>                       | <b>(n= 253)</b>                        |
| Age, years                                                |                               |                          |                                       |                                        |
| 18-29                                                     | 34% (31%-36%)                 | 44% (40%-49%)            | 42% (36%-48%)                         | 47% (41%-53%)                          |
| 30-39                                                     | 27% (25%-30%)                 | 26% (23%-30%)            | 26% (21%-32%)                         | 26% (21%-32%)                          |
| 40-49                                                     | 19% (17%-22%)                 | 10% (8%-13%)             | 9% (6%-13%)                           | 11% (8%-16%)                           |
| 50-59                                                     | 12% (10%-14%)                 | 10% (7%-12%)             | 11% (8%-15%)                          | 8% (5%-12%)                            |
| 60-69                                                     | 6% (5%-8%)                    | 7% (5%-10%)              | 9% (6%-13%)                           | 6% (4%-10%)                            |
| 70-79                                                     | 2% (1%-3%)                    | 2% (1%-4%)               | 3% (2%-6%)                            | 1% (0%-3%)                             |
| 80+                                                       | 0% (0%-1%)                    | 0% (0%-1%)               | 0% (0%-2%)                            | 0% (NA, NA)                            |
| Gender same as sex identified at birth                    |                               |                          |                                       |                                        |
| No                                                        | 1% (0%-2%)                    | 1% (1%-3%)               | 1% (0%-3%)                            | 2% (1%-5%)                             |
| Yes                                                       | 99% (98%-100%)                | 99% (97%-99%)            | 99% (97%-100%)                        | 98% (95%-99%)                          |
| Education                                                 |                               |                          |                                       |                                        |
| Less than high school                                     | 19% (17%-21%)                 | 12% (9%-15%)             | 13% (9%-17%)                          | 11% (7%-15%)                           |
| High school graduate or GED                               | 18% (16%-21%)                 | 17% (14%-20%)            | 16% (12%-21%)                         | 17% (13%-23%)                          |
| Some college, no degree                                   | 20% (18%-23%)                 | 21% (18%-25%)            | 19% (14%-24%)                         | 23% (19%-29%)                          |
| Associate degree                                          | 7% (5%-8%)                    | 5% (3%-7%)               | 5% (3%-8%)                            | 5% (3%-8%)                             |
| Occupational/tech/vocational program                      | 4% (3%-5%)                    | 4% (2%-6%)               | 2% (1%-5%)                            | 6% (3%-9%)                             |
| Bachelor's degree                                         | 20% (18%-23%)                 | 25% (22%-29%)            | 27% (22%-33%)                         | 24% (19%-30%)                          |
| Master's degree                                           | 8% (6%-10%)                   | 12% (9%-15%)             | 14% (11%-19%)                         | 9% (6%-14%)                            |
| Professional degree                                       | 3% (2%-4%)                    | 3% (2%-5%)               | 2% (1%-5%)                            | 4% (2%-7%)                             |
| Doctoral degree                                           | 1% (0%-1%)                    | 2% (1%-3%)               | 2% (1%-5%)                            | 1% (0%-3%)                             |
| Frequency of physical activity required during work shift |                               |                          |                                       |                                        |

|                                                                                               | <b>RCT subset*</b> | <b>All Observational</b> | <b>Observational-antibiotics</b> | <b>Observational-appendectomy</b> |
|-----------------------------------------------------------------------------------------------|--------------------|--------------------------|----------------------------------|-----------------------------------|
|                                                                                               | <b>(n= 1094)</b>   | <b>(n= 510)</b>          | <b>(n= 257)</b>                  | <b>(n= 253)</b>                   |
| Most or all of the time                                                                       | 37% (34%-40%)      | 35% (31%-39%)            | 34% (28%-40%)                    | 36% (30%-42%)                     |
| Some or less of the time                                                                      | 42% (39%-45%)      | 43% (39%-48%)            | 42% (36%-48%)                    | 44% (38%-50%)                     |
| Unemployed                                                                                    | 21% (18%-23%)      | 22% (19%-26%)            | 24% (19%-30%)                    | 20% (16%-26%)                     |
| Perceived same opportunities to be healthy**                                                  |                    |                          |                                  |                                   |
| No                                                                                            | 4% (3%-5%)         | 6% (4%-9%)               | 7% (4%-11%)                      | 5% (3%-9%)                        |
| Yes                                                                                           | 96% (95%-97%)      | 94% (91%-96%)            | 93% (89%-96%)                    | 95% (91%-97%)                     |
| Number of adults in the household contributing income                                         |                    |                          |                                  |                                   |
| 0                                                                                             | 4% (3%-6%)         | 7% (5%-10%)              | 8% (5%-12%)                      | 6% (4%-10%)                       |
| 1                                                                                             | 33% (30%-36%)      | 35% (31%-40%)            | 37% (31%-44%)                    | 33% (28%-40%)                     |
| 2                                                                                             | 45% (42%-48%)      | 44% (39%-48%)            | 41% (35%-48%)                    | 46% (40%-53%)                     |
| 3 or more                                                                                     | 18% (16%-20%)      | 14% (11%-18%)            | 14% (10%-19%)                    | 15% (11%-20%)                     |
| At least one other adult sharing responsibilities of caring for family members and/or friends |                    |                          |                                  |                                   |
| No                                                                                            | 19% (17%-21%)      | 17% (13%-20%)            | 18% (13%-23%)                    | 15% (11%-21%)                     |
| Yes                                                                                           | 44% (41%-47%)      | 40% (36%-45%)            | 40% (34%-47%)                    | 40% (34%-46%)                     |
| Not applicable                                                                                | 37% (34%-40%)      | 43% (39%-48%)            | 42% (36%-48%)                    | 44% (38%-51%)                     |
| Frequency needs help to read written material from the doctor or pharmacy                     |                    |                          |                                  |                                   |
| Never                                                                                         | 65% (62%-68%)      | 66% (62%-70%)            | 68% (62%-74%)                    | 64% (57%-70%)                     |
| Rarely                                                                                        | 18% (16%-21%)      | 17% (14%-21%)            | 15% (11%-20%)                    | 19% (15%-24%)                     |
| Sometimes                                                                                     | 11% (9%-13%)       | 11% (8%-14%)             | 10% (7%-14%)                     | 11% (8%-16%)                      |
| Often                                                                                         | 3% (2%-4%)         | 3% (2%-5%)               | 2% (1%-5%)                       | 4% (2%-8%)                        |
| Always                                                                                        | 3% (2%-5%)         | 3% (2%-5%)               | 4% (2%-8%)                       | 2% (1%-4%)                        |
| Lives alone                                                                                   |                    |                          |                                  |                                   |
| No                                                                                            | 88% (85%-89%)      | 87% (83%-89%)            | 85% (80%-89%)                    | 88% (83%-91%)                     |

|                                                         | <b>RCT subset*</b> | <b>All Observational</b> | <b>Observational-antibiotics</b> | <b>Observational-appendectomy</b> |
|---------------------------------------------------------|--------------------|--------------------------|----------------------------------|-----------------------------------|
|                                                         | <b>(n= 1094)</b>   | <b>(n= 510)</b>          | <b>(n= 257)</b>                  | <b>(n= 253)</b>                   |
| Yes                                                     | 12% (11%-15%)      | 13% (11%-17%)            | 15% (11%-20%)                    | 12% (9%-17%)                      |
| <b>Dependents, by sex</b>                               |                    |                          |                                  |                                   |
| Men with dependent(s)                                   | 40% (37%-43%)      | 33% (29%-37%)            | 35% (29%-41%)                    | 30% (25%-36%)                     |
| Men without dependent(s)                                | 25% (22%-28%)      | 24% (20%-28%)            | 25% (20%-30%)                    | 23% (18%-29%)                     |
| Women with dependent(s)                                 | 24% (21%-26%)      | 25% (21%-29%)            | 23% (19%-29%)                    | 26% (21%-32%)                     |
| Women without dependent(s)                              | 12% (10%-14%)      | 19% (16%-23%)            | 17% (13%-22%)                    | 21% (17%-27%)                     |
| <b>Admission source</b>                                 |                    |                          |                                  |                                   |
| Clinic                                                  | 19% (16%-21%)      | 20% (17%-24%)            | 23% (18%-29%)                    | 17% (13%-23%)                     |
| Home                                                    | 77% (74%-79%)      | 75% (71%-79%)            | 71% (65%-76%)                    | 79% (74%-84%)                     |
| Other hospital                                          | 4% (3%-6%)         | 4% (3%-7%)               | 6% (3%-9%)                       | 3% (2%-6%)                        |
| <b>Modified Charlson comorbidity index score</b>        |                    |                          |                                  |                                   |
| Mean                                                    | 0.2 (0.2-0.3)      | 0.2 (0.12-0.3)           | 0.3 (0.2-0.4)                    | 0.2 (0.1-0.2)                     |
| 0                                                       | 79% (77%-81%)      | 79% (75%-82%)            | 76% (70%-81%)                    | 83% (77%-87%)                     |
| 1                                                       | 18% (16%-20%)      | 19% (16%-23%)            | 22% (17%-27%)                    | 16% (12%-21%)                     |
| 2+                                                      | 2% (2%-3%)         | 1% (1%-3%)               | 1% (0%-3%)                       | 2% (1%-4%)                        |
| <b>History of smoking cigarettes</b>                    |                    |                          |                                  |                                   |
| No                                                      | 75% (72%-78%)      | 79% (76%-83%)            | 81% (75%-85%)                    | 78% (73%-83%)                     |
| Yes                                                     | 25% (22%-28%)      | 21% (17%-24%)            | 19% (15%-25%)                    | 22% (17%-27%)                     |
| <b>Diabetes</b>                                         |                    |                          |                                  |                                   |
| No                                                      | 97% (96%-98%)      | 98% (97%-99%)            | 98% (96%-99%)                    | 98% (95%-99%)                     |
| Yes                                                     | 3% (2%-4%)         | 2% (1%-3%)               | 2% (1%-4%)                       | 2% (1%-5%)                        |
| <b>Intensity of average pain in the previous 7 days</b> |                    |                          |                                  |                                   |
| Had no pain                                             | 12% (10%-14%)      | 10% (8%-13%)             | 12% (8%-16%)                     | 9% (6%-14%)                       |
| Mild                                                    | 22% (19%-24%)      | 28% (24%-32%)            | 31% (26%-37%)                    | 24% (19%-30%)                     |
| Moderate                                                | 36% (33%-39%)      | 34% (30%-38%)            | 34% (28%-40%)                    | 33% (28%-39%)                     |

|                                    | <b>RCT subset*</b> | <b>All Observational</b> | <b>Observational-<br/>antibiotics</b> | <b>Observational-<br/>appendectomy</b> |
|------------------------------------|--------------------|--------------------------|---------------------------------------|----------------------------------------|
|                                    | <b>(n= 1094)</b>   | <b>(n= 510)</b>          | <b>(n= 257)</b>                       | <b>(n= 253)</b>                        |
| Severe                             | 21% (19%-24%)      | 21% (17%-25%)            | 17% (13%-22%)                         | 25% (20%-30%)                          |
| Very severe                        | 9% (7%-11%)        | 7% (5%-10%)              | 6% (4%-10%)                           | 9% (6%-13%)                            |
| Duration of symptoms               |                    |                          |                                       |                                        |
| Mean                               | 1.7 (1.5-1.9)      | 1.7 (1.5-1.9)            | 1.8 (1.4-2.1)                         | 1.7 (1.4-1.9)                          |
| <1 day                             | 24% (22%-27%)      | 28% (24%-32%)            | 28% (23%-34%)                         | 27% (22%-33%)                          |
| 1 – 1.5 days                       | 42% (39%-44%)      | 41% (37%-45%)            | 39% (33%-45%)                         | 43% (37%-49%)                          |
| 2+ days                            | 34% (31%-37%)      | 32% (28%-36%)            | 33% (28%-39%)                         | 30% (24%-36%)                          |
| Migration of pain                  |                    |                          |                                       |                                        |
| No                                 | 15% (13%-18%)      | 21% (17%-24%)            | 22% (17%-28%)                         | 19% (15%-24%)                          |
| Yes                                | 85% (82%-87%)      | 79% (76%-83%)            | 78% (72%-83%)                         | 81% (76%-85%)                          |
| Anorexia                           |                    |                          |                                       |                                        |
| No                                 | 58% (55%-61%)      | 60% (55%-64%)            | 61% (55%-67%)                         | 58% (52%-64%)                          |
| Yes                                | 42% (39%-45%)      | 40% (36%-45%)            | 39% (33%-45%)                         | 42% (36%-48%)                          |
| Nausea or vomiting                 |                    |                          |                                       |                                        |
| No                                 | 27% (25%-30%)      | 25% (21%-29%)            | 29% (24%-35%)                         | 21% (17%-27%)                          |
| Yes                                | 73% (70%-75%)      | 75% (71%-79%)            | 71% (65%-76%)                         | 79% (73%-83%)                          |
| Tenderness in right lower quadrant |                    |                          |                                       |                                        |
| No                                 | 6% (5%-8%)         | 7% (5%-10%)              | 9% (6%-14%)                           | 5% (3%-9%)                             |
| Yes                                | 94% (92%-95%)      | 93% (90%-95%)            | 91% (86%-94%)                         | 95% (91%-97%)                          |
| Rebound pain                       |                    |                          |                                       |                                        |
| No                                 | 77% (75%-80%)      | 80% (76%-83%)            | 86% (81%-89%)                         | 74% (69%-79%)                          |
| Yes                                | 23% (20%-25%)      | 20% (17%-24%)            | 14% (11%-19%)                         | 26% (21%-31%)                          |
| Fever                              |                    |                          |                                       |                                        |
| No                                 | 75% (73%-78%)      | 78% (74%-81%)            | 81% (76%-85%)                         | 74% (69%-79%)                          |
| Yes                                | 25% (22%-27%)      | 22% (19%-26%)            | 19% (15%-24%)                         | 26% (21%-31%)                          |
| Leukocytosis                       |                    |                          |                                       |                                        |
| No                                 | 25% (23%-28%)      | 22% (19%-26%)            | 24% (19%-29%)                         | 21% (16%-26%)                          |

|                                      | <b>RCT subset*</b> | <b>All Observational</b> | <b>Observational-antibiotics</b> | <b>Observational-appendectomy</b> |
|--------------------------------------|--------------------|--------------------------|----------------------------------|-----------------------------------|
|                                      | <b>(n= 1094)</b>   | <b>(n= 510)</b>          | <b>(n= 257)</b>                  | <b>(n= 253)</b>                   |
| Yes                                  | 75% (72%-77%)      | 78% (74%-81%)            | 76% (71%-81%)                    | 79% (74%-84%)                     |
| Left shift                           |                    |                          |                                  |                                   |
| No                                   | 27% (24%-29%)      | 22% (19%-26%)            | 24% (19%-30%)                    | 20% (15%-25%)                     |
| Yes                                  | 73% (71%-76%)      | 78% (74%-81%)            | 76% (70%-81%)                    | 80% (75%-85%)                     |
| WBC count (thousand/microL)          |                    |                          |                                  |                                   |
| Mean                                 | 12.9 (12.7-13.2)   | 13.3 (12.9-13.7)         | 13.0 (12.5-13.5)                 | 13.6 (13.1-14.1)                  |
| Alvarado Score                       |                    |                          |                                  |                                   |
| Mean                                 | 6.6 (6.5-6.7)      | 6.6 (6.4-6.7)            | 6.3 (6.1-6.5)                    | 6.8 (6.6-7.0)                     |
| Perforation on imaging               |                    |                          |                                  |                                   |
| No/not mentioned                     | 96% (95%-97%)      | 94% (92%-96%)            | 94% (90%-96%)                    | 95% (91%-97%)                     |
| Yes                                  | 1% (1%-2%)         | 2% (1%-4%)               | 2% (1%-5%)                       | 3% (1%-5%)                        |
| Ambiguous                            | 3% (2%-4%)         | 3% (2%-5%)               | 4% (2%-7%)                       | 3% (1%-5%)                        |
| Peri-appendiceal fat stranding on CT |                    |                          |                                  |                                   |
| None or not mentioned                | 25% (23%-28%)      | 29% (25%-33%)            | 31% (26%-38%)                    | 27% (22%-33%)                     |
| Mild                                 | 28% (25%-31%)      | 29% (26%-34%)            | 31% (25%-37%)                    | 28% (23%-34%)                     |
| Moderate                             | 9% (7%-11%)        | 7% (5%-10%)              | 6% (4%-10%)                      | 8% (5%-12%)                       |
| Severe (phlegmon)                    | 2% (1%-3%)         | 1% (0%-2%)               | 0% (0%-2%)                       | 2% (1%-4%)                        |
| Present, not otherwise specified     | 36% (33%-39%)      | 33% (29%-38%)            | 31% (26%-38%)                    | 35% (29%-41%)                     |
| CT only (no ultrasound or MRI)       |                    |                          |                                  |                                   |
| No                                   | 23% (21%-26%)      | 31% (27%-35%)            | 28% (23%-34%)                    | 34% (29%-40%)                     |
| Yes                                  | 77% (74%-79%)      | 69% (65%-73%)            | 72% (66%-77%)                    | 66% (60%-71%)                     |
| Discharged from the ED               |                    |                          |                                  |                                   |
| No, admitted to the hospital         | 72% (69%-74%)      | 76% (72%-79%)            | 56% (50%-62%)                    | 97% (94%-98%)                     |
| No, other (e.g., observational unit) | 9% (7%-10%)        | 10% (8%-13%)             | 16% (12%-21%)                    | 3% (2%-6%)                        |
| Yes                                  | 20% (17%-22%)      | 15% (12%-18%)            | 28% (23%-34%)                    | 0% (NA)                           |

\*31 participants in the RCT subset and 14 participants in the observational cohort (7 antibiotics, 7 surgery) were missing data on whether their gender was the same as their sex identified at birth. 68 participants in the RCT subset and 32 participants in the observational cohort (17 antibiotics, 15 surgery) were missing data on frequency of physical activity required during work shift. 49 participants in the RCT subset and 29 participants in the observational cohort (13 antibiotics, 16 surgery) were missing data on perceived opportunities to be healthy. 102 participants in the RCT subset and 48 participants in the observational cohort (29 antibiotics, 19 surgery) were missing data on number of adults in the household contributing to income. 54 participants in the RCT subset and 26 participants in the observational cohort (12 antibiotics, 14 surgery) were missing data on whether at least one other adult shares responsibilities of caring for family members and/or friends. 48 participants in the RCT subset and 25 participants in the observational cohort (9 antibiotics, 16 surgery) were missing data on needing help to read written material from the doctor or pharmacy. 26 participants in the RCT subset and 13 participants in the observational cohort (7 antibiotics, 6 surgery) were missing data on whether they live alone. 38 participants in the RCT subset and 22 participants in the observational cohort (9 antibiotics, 13 surgery) were missing data on both sex and number of dependents. 95 participants in the RCT subset and 18 participants in the observational cohort (3 antibiotics, 15 surgery) were missing data on admission source. 3 participants in the RCT subset and 3 participants in the observational cohort (2 antibiotics, 1 surgery) were missing the modified Charlson comorbidity index score. 56 participants in the RCT subset and 33 participants in the observational cohort (15 antibiotics, 18 surgery) were missing data on history of smoking cigarettes. 34 participants in the RCT subset and 13 participants in the observational cohort (7 antibiotics, 6 surgery) were missing data on intensity of average pain in the previous 7 days. 1 participant in the RCT subset and 1 participant in the observational cohort (1 surgery) were missing data on duration of symptoms. 32 participants in the RCT subset and 13 participants in the observational cohort (8 antibiotics, 5 surgery) were missing data on migration of pain. 2 participants in the RCT subset and 3 participants in the observational cohort (1 antibiotics, 2 surgery) were missing data on nausea or vomiting. 2 participants in the RCT subset were missing data on rebound pain. 1 participant in the RCT subset was missing data on fever. 4 participants in the RCT subset and 1 participant in the observational cohort (1 surgery) were missing data on leukocytosis. 1 participant in the RCT subset was missing data on left shift. 4 participants in the RCT subset and 1 participant in the observational cohort (1 surgery) were missing data on white blood cell count. 49 participants in the RCT subset and 38 participants in the observational cohort (21 antibiotics, 17 surgery) were missing data on perforation on imaging. 44 participants in the RCT subset and 38 participants in the observational cohort (21 antibiotics, 17 surgery) were missing data on peri-appendiceal fat stranding on imaging. 20 participants in the RCT subset and 11 participants in the observational cohort (11 surgery) were missing data on whether the participant was discharged from the ED to home.

\*\*This item was worded on the baseline survey as "Do you feel you have the same opportunities to be as healthy as others?"

\*Contemporaneously recruited participants in the RCT



**eTable 2: Baseline Randomized Clinical Trial Participant Characteristics by Arm**

|                                      | <b>RCT subset-antibiotics<sup>†</sup></b> | <b>RCT subset-surgery<sup>†</sup></b> |
|--------------------------------------|-------------------------------------------|---------------------------------------|
| Age, years                           |                                           |                                       |
| Mean                                 | 38.57 (37.45-39.68)                       | 37.87 (36.71-39.04)                   |
| 18-29                                | 32% (28%-36%)                             | 35% (31%-39%)                         |
| 30-39                                | 28% (25%-32%)                             | 26% (23%-30%)                         |
| 40-49                                | 20% (17%-23%)                             | 19% (16%-23%)                         |
| 50-59                                | 13% (10%-16%)                             | 11% (8%-14%)                          |
| 60-69                                | 5% (4%-8%)                                | 7% (5%-9%)                            |
| 70-79                                | 2% (1%-3%)                                | 2% (1%-4%)                            |
| 80+                                  | 0% (0%-1%)                                | 0% (NA, NA)                           |
| Sex                                  |                                           |                                       |
| Male                                 | 65% (61%-69%)                             | 65% (60%-68%)                         |
| Female                               | 35% (31%-39%)                             | 35% (32%-40%)                         |
| Race                                 |                                           |                                       |
| White                                | 60% (56%-64%)                             | 58% (54%-62%)                         |
| Black                                | 8% (6%-11%)                               | 8% (6%-10%)                           |
| American Indian or Alaska Native     | 2% (1%-3%)                                | 1% (1%-3%)                            |
| Asian                                | 5% (4%-7%)                                | 7% (5%-10%)                           |
| Native Hawaiian or Pac Islander      | 1% (0%-2%)                                | 0% (0%-1%)                            |
| Other                                | 21% (17%-24%)                             | 22% (19%-26%)                         |
| Multiple                             | 4% (3%-6%)                                | 3% (2%-5%)                            |
| Hispanic ethnicity                   |                                           |                                       |
| No                                   | 56% (52%-60%)                             | 58% (54%-62%)                         |
| Yes                                  | 44% (40%-48%)                             | 42% (38%-46%)                         |
| Primary language                     |                                           |                                       |
| English                              | 63% (59%-67%)                             | 65% (61%-69%)                         |
| Spanish                              | 32% (28%-36%)                             | 29% (26%-33%)                         |
| Other                                | 5% (3%-7%)                                | 5% (4%-7%)                            |
| Employment                           |                                           |                                       |
| Employed                             | 73% (70%-77%)                             | 73% (69%-76%)                         |
| Student                              | 6% (4%-9%)                                | 6% (4%-8%)                            |
| Retired or other                     | 20% (17%-24%)                             | 22% (18%-25%)                         |
| Education                            |                                           |                                       |
| Less than High School                | 20% (17%-24%)                             | 18% (15%-21%)                         |
| High school graduate or GED          | 19% (16%-22%)                             | 18% (15%-21%)                         |
| Some college, no degree              | 18% (15%-22%)                             | 23% (19%-26%)                         |
| Associate degree                     | 6% (4%-8%)                                | 8% (6%-10%)                           |
| Occupational/tech/vocational program | 4% (3%-6%)                                | 4% (2%-5%)                            |
| Bachelor's Degree                    | 21% (18%-25%)                             | 20% (17%-23%)                         |
| Master's Degree                      | 8% (6%-10%)                               | 8% (6%-10%)                           |
| Professional degree                  | 3% (2%-5%)                                | 3% (2%-5%)                            |
| Doctoral degree                      | 1% (1%-2%)                                | 0% (0%-1%)                            |
| Insurance                            |                                           |                                       |
| Commercial                           | 46% (42%-50%)                             | 45% (41%-49%)                         |
| Medicare or Tricare                  | 13% (10%-16%)                             | 13% (11%-16%)                         |
| Medicaid or state                    | 16% (14%-20%)                             | 17% (14%-21%)                         |
| Other or none                        | 25% (21%-28%)                             | 25% (21%-29%)                         |

|                                                                                               |                     |                     |
|-----------------------------------------------------------------------------------------------|---------------------|---------------------|
| Below the federal poverty level or a Medicaid beneficiary                                     |                     |                     |
| No                                                                                            | 57% (52%-61%)       | 57% (52%-61%)       |
| Yes                                                                                           | 43% (39%-48%)       | 43% (39%-48%)       |
| Admission source                                                                              |                     |                     |
| Clinic                                                                                        | 20% (17%-24%)       | 17% (14%-21%)       |
| Home                                                                                          | 75% (71%-78%)       | 79% (76%-83%)       |
| Other hospital                                                                                | 5% (4%-8%)          | 3% (2%-5%)          |
| Modified Charlson comorbidity index score                                                     |                     |                     |
| Mean                                                                                          | 0.25 (0.2-0.29)     | 0.24 (0.2-0.29)     |
| 0                                                                                             | 79% (75%-82%)       | 80% (76%-83%)       |
| 1                                                                                             | 19% (16%-22%)       | 17% (14%-21%)       |
| 2+                                                                                            | 2% (1%-4%)          | 2% (1%-4%)          |
| Body mass index                                                                               |                     |                     |
| mean                                                                                          | 29.02 (28.36-29.68) | 28.75 (28.21-29.29) |
| History of smoking cigarettes                                                                 |                     |                     |
| No                                                                                            | 76% (72%-80%)       | 74% (70%-77%)       |
| Yes                                                                                           | 24% (20%-28%)       | 26% (23%-30%)       |
| Diabetes                                                                                      |                     |                     |
| No                                                                                            | 97% (96%-98%)       | 97% (96%-98%)       |
| Yes                                                                                           | 3% (2%-4%)          | 3% (2%-4%)          |
| Gender same as sex assigned at birth                                                          |                     |                     |
| No                                                                                            | 1% (1%-2%)          | 1% (0%-2%)          |
| Yes                                                                                           | 99% (98%-99%)       | 99% (98%-100%)      |
| Worried about out-of-pocket bills from being admitted                                         |                     |                     |
| No                                                                                            | 31% (27%-35%)       | 31% (27%-35%)       |
| Yes                                                                                           | 69% (65%-73%)       | 69% (65%-73%)       |
| Frequency of physical activity required during work shift                                     |                     |                     |
| Most of the time                                                                              | 39% (35%-43%)       | 36% (32%-40%)       |
| Some or less                                                                                  | 40% (36%-45%)       | 44% (39%-48%)       |
| Unemployed                                                                                    | 21% (18%-25%)       | 21% (18%-25%)       |
| Perceived same opportunities to be healthy**                                                  |                     |                     |
| No                                                                                            | 4% (3%-6%)          | 3% (2%-5%)          |
| Yes                                                                                           | 96% (94%-97%)       | 97% (95%-98%)       |
| Number of adults in the household contributing income                                         |                     |                     |
| 0                                                                                             | 3% (2%-5%)          | 5% (4%-8%)          |
| 1                                                                                             | 35% (31%-39%)       | 31% (27%-36%)       |
| 2                                                                                             | 44% (40%-48%)       | 46% (41%-50%)       |
| 3 or more                                                                                     | 18% (15%-22%)       | 18% (14%-21%)       |
| Number of dependents                                                                          |                     |                     |
| 0                                                                                             | 37% (33%-41%)       | 36% (32%-41%)       |
| 1 or more                                                                                     | 63% (59%-67%)       | 64% (59%-68%)       |
| At least one other adult sharing responsibilities of caring for family members and/or friends |                     |                     |
| No                                                                                            | 20% (17%-24%)       | 18% (15%-21%)       |
| Yes                                                                                           | 43% (38%-47%)       | 45% (41%-50%)       |
| Not applicable                                                                                | 37% (33%-41%)       | 37% (33%-41%)       |

|                                                                           |                  |                  |
|---------------------------------------------------------------------------|------------------|------------------|
| Frequency needs help to read written material from the doctor or pharmacy |                  |                  |
| Never                                                                     | 64% (60%-68%)    | 66% (62%-70%)    |
| Rarely                                                                    | 18% (15%-21%)    | 19% (16%-22%)    |
| Sometimes                                                                 | 10% (8%-13%)     | 12% (9%-15%)     |
| Often                                                                     | 4% (3%-6%)       | 2% (1%-3%)       |
| Always                                                                    | 4% (3%-6%)       | 2% (1%-4%)       |
| Lives alone                                                               |                  |                  |
| No                                                                        | 88% (85%-90%)    | 87% (84%-90%)    |
| Yes                                                                       | 12% (10%-15%)    | 13% (10%-16%)    |
| Dependents by sex                                                         |                  |                  |
| Men with dependent(s)                                                     | 40% (36%-44%)    | 39% (35%-44%)    |
| Men without dependent(s)                                                  | 24% (21%-28%)    | 25% (22%-29%)    |
| Women with dependent(s)                                                   | 23% (20%-27%)    | 24% (21%-28%)    |
| Women without dependent(s)                                                | 12% (10%-15%)    | 11% (9%-14%)     |
| Average pain in the previous 7 days**                                     |                  |                  |
| Mean                                                                      | 5.2 (4.95-5.46)  | 5.33 (5.08-5.58) |
| Intensity of average pain in the previous 7 days                          |                  |                  |
| Had no pain                                                               | 12% (10%-15%)    | 12% (9%-15%)     |
| Mild                                                                      | 24% (20%-27%)    | 20% (16%-23%)    |
| Moderate                                                                  | 35% (31%-39%)    | 38% (34%-42%)    |
| Severe                                                                    | 21% (18%-24%)    | 22% (19%-26%)    |
| Very severe                                                               | 9% (7%-11%)      | 9% (7%-12%)      |
| Max pain recorded in the emergency department                             |                  |                  |
| Mean                                                                      | 7.26 (7.07-7.45) | 7.2 (7.01-7.4)   |
| Duration of symptoms                                                      |                  |                  |
| Mean                                                                      | 1.84 (1.49-2.19) | 1.57 (1.43-1.7)  |
| <1 day                                                                    | 24% (20%-28%)    | 25% (22%-29%)    |
| 1 – 1.5 days                                                              | 39% (35%-43%)    | 44% (40%-48%)    |
| 2+ days                                                                   | 37% (33%-41%)    | 31% (27%-35%)    |
| Alvarado Score                                                            |                  |                  |
| Mean                                                                      | 6.54 (6.4-6.68)  | 6.6 (6.45-6.75)  |
| Migration of pain                                                         |                  |                  |
| No                                                                        | 17% (14%-21%)    | 13% (11%-16%)    |
| Yes                                                                       | 83% (79%-86%)    | 87% (84%-89%)    |
| Anorexia                                                                  |                  |                  |
| No                                                                        | 57% (52%-61%)    | 59% (55%-63%)    |
| Yes                                                                       | 43% (39%-48%)    | 41% (37%-45%)    |
| Nausea or vomiting                                                        |                  |                  |
| No                                                                        | 28% (25%-32%)    | 26% (23%-30%)    |
| Yes                                                                       | 72% (68%-75%)    | 74% (70%-77%)    |
| Tenderness in RLQ                                                         |                  |                  |
| No                                                                        | 6% (4%-9%)       | 6% (4%-8%)       |
| Yes                                                                       | 94% (91%-96%)    | 94% (92%-96%)    |
| Rebound pain                                                              |                  |                  |
| No                                                                        | 78% (75%-81%)    | 77% (73%-80%)    |
| Yes                                                                       | 22% (19%-25%)    | 23% (20%-27%)    |
| Fever                                                                     |                  |                  |
| No                                                                        | 74% (70%-77%)    | 77% (73%-80%)    |
| Yes                                                                       | 26% (23%-30%)    | 23% (20%-27%)    |
| Leukocytosis                                                              |                  |                  |

|                                          |                     |                     |
|------------------------------------------|---------------------|---------------------|
| No                                       | 25% (22%-29%)       | 25% (22%-29%)       |
| Yes                                      | 75% (71%-78%)       | 75% (71%-78%)       |
| White blood cell count (thousand/microL) |                     |                     |
| Mean                                     | 12.77 (12.44-13.11) | 13.05 (12.71-13.4)  |
| Left shift                               |                     |                     |
| No                                       | 27% (24%-31%)       | 26% (22%-30%)       |
| Yes                                      | 73% (69%-76%)       | 74% (70%-78%)       |
| Appendiceal diameter on imaging          |                     |                     |
| Mean                                     | 11.42 (11.16-11.68) | 11.32 (11.05-11.58) |
| Appendicolith on imaging                 |                     |                     |
| No                                       | 74% (70%-77%)       | 74% (70%-77%)       |
| Yes                                      | 25% (22%-29%)       | 25% (22%-29%)       |
| Peri-appendiceal fat stranding on CT     |                     |                     |
| None or not mentioned                    | 24% (21%-28%)       | 26% (23%-30%)       |
| Mild                                     | 30% (26%-34%)       | 26% (22%-30%)       |
| Moderate                                 | 10% (7%-12%)        | 8% (6%-11%)         |
| Severe (phlegmon)                        | 2% (1%-4%)          | 2% (1%-3%)          |
| Present, not otherwise specified         | 34% (30%-38%)       | 38% (34%-42%)       |
| Abscess on imaging                       |                     |                     |
| No or not mentioned                      | 100% (99%-100%)     | 100% (99%-100%)     |
| Ambiguous                                | 0% (NA, NA)         | 0% (NA, NA)         |
| Present                                  | 0% (NA, NA)         | 0% (NA, NA)         |
| Perforation on imaging                   |                     |                     |
| No or not mentioned                      | 96% (94%-97%)       | 96% (94%-97%)       |
| Ambiguous                                | 2% (1%-4%)          | 3% (2%-5%)          |
| Present                                  | 2% (1%-3%)          | 1% (0%-2%)          |
| EQ-5D at baseline                        |                     |                     |
| Mean                                     | 0.69 (0.67-0.71)    | 0.69 (0.67-0.71)    |
| CT only (no ultrasound or MRI)           |                     |                     |
| No                                       | 21% (18%-25%)       | 25% (22%-29%)       |
| Yes                                      | 79% (75%-82%)       | 75% (71%-78%)       |
| Discharged from the emergency department |                     |                     |
| No, admitted to the hospital             | 52% (48%-57%)       | 92% (89%-94%)       |
| No, other (e.g., observational unit)     | 14% (11%-17%)       | 3% (2%-5%)          |
| Yes                                      | 34% (30%-38%)       | 5% (3%-7%)          |

\*5 participants randomized to antibiotics and 7 participants randomized to surgery were missing data on race. 2 participants randomized to antibiotics and 3 participants randomized to surgery were missing data on employment status. 7 participants randomized to antibiotics and 9 participants randomized to surgery were missing data on education. 9 participants randomized to antibiotics and 15 participants randomized to surgery were missing data on insurance. 131 participants randomized to antibiotics and 107 participants randomized to surgery were missing data on being below the federal poverty level or a Medicaid beneficiary. 41 participants randomized to antibiotics and 54 participants randomized to surgery were missing data on admission source. 2 participants randomized to antibiotics and 1 participant randomized to surgery were missing data on modified Charlson comorbidity index score. 128 participants randomized to antibiotics and 42 participants randomized to surgery were missing data on body mass index. 35 participants randomized to antibiotics and 21 participants randomized to surgery were missing data on history of smoking cigarettes. 11 participants randomized to antibiotics and 20 participants randomized to surgery were missing data on gender same as sex assigned at birth. 11 participants randomized to antibiotics and 15 participants randomized to surgery were missing data on being worried about out-of-pocket bills from being admitted. 33 participants randomized to antibiotics and 35 participants randomized to surgery were missing data on frequency of physical activity required during work shift. 25 participants randomized to antibiotics and 24 participants randomized to surgery were missing data on perceived opportunities to be healthy. 43 participants randomized to antibiotics and 59 participants randomized to surgery were missing data on number of adults in the household contributing to income. 15 participants randomized to antibiotics and 23 participants randomized to surgery were missing data on number of dependents. 21 participants randomized to antibiotics and 33 participants randomized to surgery were missing data on whether at least one other adult shares responsibility for caring for family members and/or friends. 19 participants randomized to antibiotics and 29 participants randomized to surgery were missing data on needing help to read written material from the

doctor or pharmacy. 9 participants randomized to antibiotics and 17 participants randomized to surgery were missing data on living status. 15 participants randomized to antibiotics and 23 participants randomized to surgery were missing data on both number of dependents and sex. 17 participants randomized to antibiotics and 18 participants randomized to surgery were missing data on average pain in the previous 7 days. 15 participants randomized to antibiotics and 19 participants randomized to surgery were missing data on intensity of average pain in the previous 7 days. 73 participants randomized to antibiotics and 69 participants randomized to surgery were missing data on max pain score recorded in the emergency department. 1 participant randomized to surgery was missing data on duration of symptoms. 19 participants randomized to antibiotics and 19 participants randomized to surgery were missing data on Alvarado score. 16 participants randomized to antibiotics and 16 participants randomized to surgery were missing data on migration of pain. 1 participant randomized to antibiotics and 1 participant randomized to surgery were missing data on nausea or vomiting. 2 participants randomized to surgery were missing data on rebound pain. 1 participant randomized to surgery was missing data on fever. 2 participants randomized to antibiotics and 2 participants randomized to surgery were missing data on leukocytosis. 1 participant randomized to surgery was missing data on left shift. 2 participants randomized to antibiotics and 2 participants randomized to surgery were missing data on white blood cell count. 67 participants randomized to antibiotics and 73 participants randomized to surgery were missing data on appendiceal diameter on imaging. 18 participants randomized to antibiotics and 26 participants randomized to surgery were missing data on peri-appendiceal fat stranding on imaging. 1 participant randomized to surgery was missing data on abscess on imaging. 19 participants randomized to antibiotics and 30 participants randomized to surgery were missing data on perforation on imaging. 33 participants randomized to antibiotics and 32 participants randomized to surgery were missing data on EQ-5D at baseline. 20 participants randomized to surgery were missing data on whether the participant was discharged from the ED to home.

\*\*This item was worded on the baseline survey as "Do you feel you have the same opportunities to be as healthy as other

\*Contemporaneously recruited participants in the RCT

eAppendix 1: Analysis comparing odds of appendectomy between the observational cohort and contemporaneous RCT cohort

For the analysis comparing odds of appendectomy between the observational cohort and contemporaneous RCT cohort, variables included in the MICE algorithm in addition to appendectomy status at 30 days and 1 year, appendicolith, site, and cohort:

Age (years), Sex, BMI (less than 25, 25 to 35, or more than 35), Duration of symptoms (less than a day or 1+ days), Average pain in the previous seven days, white blood cell count (thousand/microL), Fever, Nausea/vomiting/anorexia, Appendiceal diameter, Perforation/abscess/fat, Periappendiceal fat, Periappendiceal fluid, Height (cm), Weight (kg), Diabetes, Alvarado score, Charlson score, EQ-5D at index, Lives alone, Primary language (English/other or Spanish), Insurance (Commercial, Medicare/Tricare, Medicaid/state, or Other/none), Employment (Employed, Student, or Unemployed/Other), Education (HS/GED or less, or some beyond HS/GED), Number of adults in the household with income, Number of dependents, Sharing responsibilities of dependents, Physical at work (Most or all of the time, some of the time or less, or not employed), Smoking history (yes or no), Combined household income, Global Health questions 1–9 (each with a five-point scale rating, covering general health, quality of life, physical health, mental health, social activities/relationships, and everyday physical activities), Language for trial (Spanish or English), Health literacy help, Worried about bills, Below poverty or Medicaid/state

## **eAppendix 2. The CODA Trial Sites and Site Leads**

### ***CODA Trial***

*Sites and Site Leads:* Bellevue Hospital Center New York University School of Medicine: Patricia Ayoung-Chee, MD, MPH, William Chiang, MD; Beth Israel Deaconess Medical Center: Charles Parsons, MD, Stephen R. Odom, MD, Nathan I. Shapiro, MD, MPH; Boston University Medical Center: Sabrina E. Sanchez, MD, MPH, F. Thurston Drake, MD, MPH; Columbia University Medical Center: Katherine Fischkoff, MD, Aleksandr Tichter, MD; Harbor UCLA Medical Center: Daniel A. DeUgarte, MD, Amy H. Kaji, MD, PhD; Harborview Medical Center: Heather Evans, MD, MS, Joseph Cuschieri, MD, Amber K. Sabbatini, MD, MPH; Henry Ford Health System: Jeffrey Johnson, MD, Joe H. Patton, MD; Madigan Army Medical Center: Vance Sohn, MD, Karen McGrane, MD; Maine Medical Center: Damien W. Carter, MD; The Ohio State University Wexner Medical Center: Steven Steinberg, MD, David Evans, MD; Olive View UCLA Medical Center: Darin Saltzman MD, PhD, David A. Talan, MD, Gregory J. Moran, MD; Providence Regional Medical Center Everett: Careen S. Foster, MD, Brandon Tudor, MD; Rush University Medical Center: Thea P. Price, MD; Swedish Medical Center: Katherine A. Mandell, MD, MPH; Tisch Hospital NYU Langone Medical Center: Patricia Ayoung-Chee, MD, MPH, William Chiang, MD; UCHHealth University of Colorado Hospital: Lisa Ferrigno, MD, MPH, Matthew Salzberg, MD, MBA; University of Iowa Hospitals and Clinics: Dionne A. Skeete, MD, Brett A. Faine, PharmD, MS; Michigan Medicine: Pauline K. Park, MD, Hasan B. Alam, MD; University of Mississippi Medical Center: Matthew E. Kutcher, MD, MS, Alan Jones, MD; McGovern Medical School at The University of Texas Health Science Center at Houston (UTHealth): Lillian S. Kao, MD, MS; University of Texas Lyndon B. Johnson General Hospital: Mike K. Liang, MD; University of Washington Medical Center: Giana H. Davidson, MD, MPH, Amber K. Sabbatini, MD, MPH; Vanderbilt University Medical Center: Callie M. Thompson, MD, Wesley H. Self, MD, MPH; Virginia Mason Medical Center: Abigail Wiebusch, MD, Juliana T. Yu, MD; Weill Cornell Medical Center: Robert J. Winchell, MD, Sunday Clark, ScD, MPH.

*Executive Committee:* Bonnie Bizzell, MBA, MEd (Chair, Patient Advisory Board); Bryan Comstock, MS (Operations Director, Data Coordinating Center); Giana Davidson, MD, MPH (Chair, Clinical Coordinating Center); Erin Fannon (Senior Project Manager); David R. Flum, MD, MPH (Co-Principal Investigator); Patrick J. Heagerty, PhD, MS (Director, Data Coordinating Center); Larry G. Kessler, ScD (Chair, Executive Committee); Anusha Krishnadasan, PhD (Project Manager, California); Danielle C. Lavalley, PharmD, PhD (Director, Stakeholder Coordinating Center); Sarah O. Lawrence, MA (Director, Stakeholder Coordinating Center); Sarah E. Monsell, MS (Lead Biostatistician); Kelsey Pullar, MPH (Research Coordinator Lead); David A. Talan, MD (Co-Principal Investigator); Erika Wolff, PhD (Executive Director, SORCE (UOW))

*Patient Advisory Board:* Meredith Weiss, Kimberly Deeney, Heather VanDusen, Elliott Skopin, Mary Guiden, Miriam Hernandez

*National Advisory Board:* Emily E. Anderson, PhD, MPH; Darrell A. Campbell, Jr., MD; Fergal Fleming, MD; David B. Hoyt, MD; J.J. Tepas III, MD (Deceased); Richard W. Whitten, MD; SreyRam Kuy, MD; Daniel S. Lessler, MD, MHA.

*Data Safety and Monitoring Board:* Karla Ballman, PhD; Thomas Diflo, MD; Bruce Wolfe, MD; Arden Morris, MD; Donald Yealy, MD. Patient Advisors: Kathleen O'Connor, EdD; Olga Owens, N-PC
