# Supplementary material
Source: PubMed Central journal article supplement (PMC9134042)
Supplement: jamasurg-e221554-s002.pdf [file jamasurg-e221554-s002.pdf]

\*Indicates required information. Only first name, last name, and suffix will appear in PubMed.

| <b>*Group Name(s): CODA Collaborative</b> |                   |                              |                  |                                      |                                          |                                                         |                                                                                            |
|-------------------------------------------|-------------------|------------------------------|------------------|--------------------------------------|------------------------------------------|---------------------------------------------------------|--------------------------------------------------------------------------------------------|
| <b>*First Name and Middle Initial(s)</b>  | <b>*Last Name</b> | <b>*Suffix (eg, Jr, III)</b> | Academic Degrees | Institution                          | Location (city, state/province, country) | Role or Contribution, eg, chair, principal investigator | Group (if more than 1 Group listed in the byline) and/or Subgroup (eg, Steering Committee) |
| Charles                                   | Parsons           |                              | MD               | Beth Israel Deaconess Medical Center | Boston, MA                               | Co-Investigator                                         | Clinical Coordinating Center                                                               |
| Nathan I.                                 | Shapiro           |                              | MD, MPH          | Beth Israel Deaconess Medical Center | Boston, MA                               | Co-Investigator                                         | Clinical Coordinating Center                                                               |
| Randall                                   | Cooper            |                              |                  | Columbia University Medical Center   | New York, NY                             | Co-Investigator                                         | Clinical Coordinating Center                                                               |
| Aleksandr                                 | Tichter           |                              | MD               | Columbia University Medical Center   | New York, NY                             | Co-Investigator                                         | Clinical Coordinating Center                                                               |
| Ross                                      | Fleischman        |                              | MD               | Harbor UCLA Medical Center           | Los Angeles, CA                          | Co-Investigator                                         | Clinical Coordinating Center                                                               |
| Erin C.                                   | Howell            |                              | MD               | Harbor UCLA Medical Center           | Los Angeles, CA                          | Co-Investigator                                         | Clinical Coordinating Center                                                               |
| Dennis                                    | Kim               |                              | MD               | Harbor UCLA Medical Center           | Los Angeles, CA                          | Co-Investigator                                         | Clinical Coordinating Center                                                               |
| Brant                                     | Putnam            |                              | MD               | Harbor UCLA Medical Center           | Los Angeles, CA                          | Co-Investigator                                         | Clinical Coordinating Center                                                               |
| Lara H.                                   | Spence            |                              | MD               | Harbor UCLA Medical Center           | Los Angeles, CA                          | Co-Investigator                                         | Clinical Coordinating Center                                                               |
| Hikmatullah                               | Arif              |                              |                  | Harborview Medical Center            | Seattle, WA                              | Study Staff                                             | Clinical Coordinating Center                                                               |
| Farhood                                   | Farjah            |                              | MD, MPH          | Harborview Medical Center            | Seattle, WA                              | Co-Investigator                                         |                                                                                            |
| Laura                                     | Hennessey         |                              | RN               | Harborview Medical Center            | Seattle, WA                              | Study Staff                                             | Clinical Coordinating Center                                                               |
| Kelsey                                    | Pullar            |                              | MPH              | Harborview Medical Center            | Seattle, WA                              | Study Staff                                             | Clinical Coordinating Center                                                               |
| Erika                                     | Wolff             |                              | PhD              | Harborview Medical Center            | Seattle, WA                              | Co-Investigator                                         | Executive Committee                                                                        |
| Lillian Adrianna                          | Hayes             |                              |                  | Henry Ford Health System             | Detroit, MI                              | Study Staff                                             | Clinical Coordinating Center                                                               |
| Alyssa                                    | Hayward           |                              |                  | Henry Ford Health System             | Detroit, MI                              | Study Staff                                             | Clinical Coordinating Center                                                               |
| Joe H.                                    | Patton            |                              | MD               | Henry Ford Health System             | Detroit, MI                              | Co-Investigator                                         | Clinical Coordinating Center                                                               |
| Vance                                     | Sohn              |                              | MD               | Madigan Army Medical Center          | Joint Base Lewis-McChord,                | Co-Investigator                                         | Clinical Coordinating Center                                                               |
| Debra                                     | Burris            |                              | RN               | Maine Medical Center                 | Portland, ME                             | Study Staff                                             | Clinical Coordinating Center                                                               |
| Damien                                    | Carter            |                              | MD               | Maine Medical Center                 | Portland, ME                             | Co-Investigator                                         | Clinical Coordinating Center                                                               |
| Bruce                                     | Chung             |                              | MD               | Maine Medical Center                 | Portland, ME                             | Co-Investigator                                         | Clinical Coordinating Center                                                               |
| Terilee                                   | Gerry             |                              | MS, RN           | Maine Medical Center                 | Portland, ME                             | Study Staff                                             | Clinical Coordinating Center                                                               |
| Joseph                                    | Mack              |                              | MD               | Maine Medical Center                 | Portland, ME                             | Co-Investigator                                         | Clinical Coordinating Center                                                               |
| David                                     | MacKenzie         |                              | MD               | Maine Medical Center                 | Portland, ME                             | Co-Investigator                                         | Clinical Coordinating Center                                                               |
| Hasan                                     | Alam              |                              | MD               | Michigan Medicine                    | Ann Arbor, MI                            | Co-Investigator                                         | Clinical Coordinating Center                                                               |
| Nathan                                    | Haas              |                              | MD               | Michigan Medicine                    | Ann Arbor, MI                            | Co-Investigator                                         | Clinical Coordinating Center                                                               |
| Cindy                                     | Hsu               |                              | MD, PHD          | Michigan Medicine                    | Ann Arbor, MI                            | Co-Investigator                                         | Clinical Coordinating Center                                                               |
| Norman                                    | Olbrich           |                              |                  | Michigan Medicine                    | Ann Arbor, MI                            | Study Staff                                             | Clinical Coordinating Center                                                               |
| Pauline                                   | Park              |                              | MD               | Michigan Medicine                    | Ann Arbor, MI                            | Co-Investigator                                         | Clinical Coordinating Center                                                               |
| Krishnan                                  | Raghavendran      |                              | MBBS, MS         | Michigan Medicine                    | Ann Arbor, MI                            | Study Staff                                             | Clinical Coordinating Center                                                               |
| Robert                                    | Bennion           |                              | MD               | Olive View UCLA Medical Center       | Los Angeles, CA                          | Co-Investigator                                         | Clinical Coordinating Center                                                               |
| Formosa                                   | Chen              |                              | MD, MPH          | Olive View UCLA Medical Center       | Los Angeles, CA                          | Co-Investigator                                         | Clinical Coordinating Center                                                               |
| Debbie                                    | Mireles           |                              | NP               | Olive View UCLA Medical Center       | Los Angeles, CA                          | Study Staff                                             | Clinical Coordinating Center                                                               |
| Gregory                                   | Moran             |                              | MD               | Olive View UCLA Medical Center       | Los Angeles, CA                          | Co-Investigator                                         | Clinical Coordinating Center                                                               |
| Kavitha                                   | Pathmarajah       |                              | MPH              | Olive View UCLA Medical Center       | Los Angeles, CA                          | Study Staff                                             | Clinical Coordinating Center                                                               |
| Darin                                     | Saltzman          |                              | MD, PhD          | Olive View UCLA Medical Center       | Los Angeles, CA                          | Co-Investigator                                         | Clinical Coordinating Center                                                               |
| Lisandra                                  | Uribe             |                              | BA               | Olive View UCLA Medical Center       | Los Angeles, CA                          | Study Staff                                             | Clinical Coordinating Center                                                               |
| Paul J                                    | Schmit            |                              | MD               | Olive View UCLAMedical Center        | Los Angeles, CA                          | Co-Investigator                                         | Clinical Coordinating Center                                                               |
| Bruce                                     | Wolfe             |                              | MD               | Oregon Health & Science University   | Portland, OR                             | Clinical Reviewer                                       | Data Safety and Monitoring Board                                                           |
| Kimberly                                  | Deeney            |                              | BA               | PAB                                  | Medford, MA                              | Advisor                                                 | Patient Advisory Board                                                                     |
| Mary                                      | Guiden            |                              | BA               | PAB                                  | Fort Collins, CO                         | Advisor                                                 | Patient Advisory Board                                                                     |
| Miriam                                    | Hernandez         |                              |                  | PAB                                  |                                          | Advisor                                                 | Patient Advisory Board                                                                     |
| Elliott                                   | Skopin            |                              | BS               | PAB                                  | Seattle, WA                              | Advisor                                                 | Patient Advisory Board                                                                     |
| Heather                                   | VanDusen          |                              | BS               | PAB                                  | Seattle, WA                              | Advisor                                                 | Patient Advisory Board                                                                     |
| Meridith                                  | Weiss             |                              | MPH              | PAB                                  | Seattle, WA                              | Advisor                                                 | Patient Advisory Board                                                                     |

\*Indicates required information. Only first name, last name, and suffix will appear in PubMed.

| *First Name and Middle Initial(s) | *Last Name | *Suffix (eg, Jr, III) | Academic Degrees | Institution                                            | Location (city, state/province, country) | Role or Contribution, eg, chair, principal investigator | Group (if more than 1 Group listed in the byline) and/or Subgroup (eg, Steering Committee) |
|-----------------------------------|------------|-----------------------|------------------|--------------------------------------------------------|------------------------------------------|---------------------------------------------------------|--------------------------------------------------------------------------------------------|
| Careen                            | Foster     |                       | MD               | Providence Regional Medical Center Everett             | Everett, Washington                      | Co-Investigator                                         | Clinical Coordinating Center                                                               |
| Shaina                            | Schaetzel  |                       | MD               | Providence Regional Medical Center Everett             | Everett, Washington                      | Co-Investigator                                         | Clinical Coordinating Center                                                               |
| Brandon                           | Tudor      |                       | MD               | Providence Regional Medical Center Everett             | Everett, Washington                      | Co-Investigator                                         | Clinical Coordinating Center                                                               |
| Arden                             | Morris     |                       | MD, MPH          | Stanford University                                    | Stanford, CA                             | Clinical Reviewer                                       | Data Safety and Monitoring Board                                                           |
| Ryan                              | Martinez   |                       | MD               | Swedish Medical Center                                 | Seattle, WA                              | Co-Investigator                                         | Clinical Coordinating Center                                                               |
| Dayna                             | Morgan     |                       | MSNBC            | Swedish Medical Center                                 | Seattle, WA                              | Study Staff                                             | Clinical Coordinating Center                                                               |
| John                              | Tschirhart |                       | MD               | Swedish Medical Center                                 | Seattle, WA                              | Co-Investigator                                         | Clinical Coordinating Center                                                               |
| Julie                             | Wallick    |                       | BS, BA           | Swedish Medical Center                                 | Seattle, WA                              | Study Staff                                             | Clinical Coordinating Center                                                               |
| Sean                              | Wells      |                       | MD               | Swedish Medical Center                                 | Seattle, WA                              | Co-Investigator                                         | Clinical Coordinating Center                                                               |
| Amy                               | Rushing    |                       | MD               | The Ohio State University Wexner Medical Center        | Columbus, OH                             | Co-Investigator                                         | Clinical Coordinating Center                                                               |
| Steven                            | Steinberg  |                       | MD               | The Ohio State University Wexner Medical Center        | Columbus, OH                             | Co-Investigator                                         | Clinical Coordinating Center                                                               |
| Mohamad                           | Abouzeid   |                       | MD               | Tisch Hospital NYU Langone Medical Center              | New York, NY                             | Co-Investigator                                         | Clinical Coordinating Center                                                               |
| William                           | Chiang     |                       | MD               | Tisch Hospital NYU Langone Medical Center              | New York, NY                             | Co-Investigator                                         | Clinical Coordinating Center                                                               |
| Jason                             | Maggi      |                       | MD               | Tisch Hospital NYU Langone Medical Center              | New York, NY                             | Co-Investigator                                         | Clinical Coordinating Center                                                               |
| Marcovalerio                      | Melis      |                       | MD               | Tisch Hospital NYU Langone Medical Center              | New York, NY                             | Co-Investigator                                         | Clinical Coordinating Center                                                               |
| Kristyn                           | Pierce     |                       | MS               | Tisch Hospital NYU Langone Medical Center              | New York, NY                             | Co-Investigator                                         | Clinical Coordinating Center                                                               |
| Paresh                            | Shah       |                       | MD               | Tisch Hospital NYU Langone Medical Center              | New York, NY                             | Co-Investigator                                         | Clinical Coordinating Center                                                               |
| Prashant                          | Sinha      |                       | MD               | Tisch Hospital NYU Langone Medical Center              | New York, NY                             | Co-Investigator                                         | Clinical Coordinating Center                                                               |
| Brett                             | Faine      |                       | PharmD           | University of Iowa Hospitals and Clinics               | Iowa City, IA                            | Co-Investigator                                         | Clinical Coordinating Center                                                               |
| Cathy                             | Fairfield  |                       | BSN              | University of Iowa Hospitals and Clinics               | Iowa City, IA                            | Study Staff                                             | Clinical Coordinating Center                                                               |
| Dionne                            | Skeete     |                       | MD               | University of Iowa Hospitals and Clinics               | Iowa City, IA                            | Co-Investigator                                         | Clinical Coordinating Center                                                               |
| Deepti                            | Patki      |                       | MS               | University of Mississippi Medical Center               | Jackson, MS                              | Study Staff                                             | Clinical Coordinating Center                                                               |
| Rebekah K.                        | Peacock    |                       | RN               | University of Mississippi Medical Center               | Jackson, MS                              | Study Staff                                             | Clinical Coordinating Center                                                               |
| Donald M.                         | Yealy      |                       | MD               | University of Pittsburgh Medical Center                | Pittsburgh, PA                           | Clinical Reviewer                                       | Data Safety and Monitoring Board                                                           |
| Karla                             | Bernardi   |                       | MD               | University of Texas Lyndon B. Johnson General Hospital | Houston, TX                              | Co-Investigator                                         | Clinical Coordinating Center                                                               |
| Naila                             | Dhanani    |                       | MD               | University of Texas Lyndon B. Johnson General Hospital | Houston, TX                              | Co-Investigator                                         | Clinical Coordinating Center                                                               |
| Tien C.                           | Ko         |                       | MD               | University of Texas Lyndon B. Johnson General Hospital | Houston, TX                              | Co-Investigator                                         | Clinical Coordinating Center                                                               |
| Debbie                            | Lew        |                       |                  | University of Texas Lyndon B. Johnson General Hospital | Houston, TX                              | Study Staff                                             | Clinical Coordinating Center                                                               |
| Stephanie                         | Marquez    |                       |                  | University of Texas Lyndon B. Johnson General Hospital | Houston, TX                              | Co-Investigator                                         | Clinical Coordinating Center                                                               |
| Oscar                             | Olavarria  |                       | MD               | University of Texas Lyndon B. Johnson General Hospital | Houston, TX                              | Co-Investigator                                         | Clinical Coordinating Center                                                               |
| Karen                             | Horvath    |                       | MD               | University of Washington                               | Seattle, WA                              | Co-Investigator                                         | Clinical Coordinating Center                                                               |
| Daniel                            | Kim        |                       | MD               | University of Washington                               | Seattle, WA                              | Co-Investigator                                         | Clinical Coordinating Center                                                               |
| Zoe                               | Parr       |                       | MD               | University of Washington                               | Seattle, WA                              | Co-Investigator                                         | Clinical Coordinating Center                                                               |
| Estel                             | Williams   |                       | MD               | University of Washington                               | Seattle, WA                              | Co-Investigator                                         | Clinical Coordinating Center                                                               |
| Karen F.                          | Miller     |                       | RN, MPA          | Vanderbilt University Medical Center                   | Nashville, Tennessee                     | Study Staff                                             | Clinical Coordinating Center                                                               |
| Kelly M.                          | Moser      |                       |                  | Vanderbilt University Medical Center                   | Nashville, Tennessee                     | Study Staff                                             | Clinical Coordinating Center                                                               |
| Scott                             | Osborn     |                       | MD               | Virginia Mason Medical Center                          | Seattle, WA                              | Co-Investigator                                         | Clinical Coordinating Center                                                               |
| Abigail                           | Wiebusch   |                       | MD               | Virginia Mason Medical Center                          | Seattle, WA                              | Co-Investigator                                         | Clinical Coordinating Center                                                               |
| Julianna                          | Yu         |                       | MD               | Virginia Mason Medical Center                          | Seattle, WA                              | Co-Investigator                                         | Clinical Coordinating Center                                                               |
| Karla                             | Ballman    |                       | PhD              | Weill Cornell Medical Center                           | New York, NY                             | Clinical Reviewer                                       | Data Safety and Monitoring Board                                                           |
| Sunday                            | Clark      |                       | ScD, MPH         | Weill Cornell Medical Center                           | New York, NY                             | Co-Investigator                                         | Clinical Coordinating Center                                                               |
| Billie                            | Johnsson   |                       | MS               | Weill Cornell Medical Center                           | New York, NY                             | Co-Investigator                                         | Clinical Coordinating Center                                                               |
| Lauren                            | Mount      |                       | MD               | Weill Cornell Medical Center                           | New York, NY                             | Co-Investigator                                         | Clinical Coordinating Center                                                               |
| Thomas                            | Diflo      |                       | MD               | Westchester Medical Center                             | Valhalla, NY                             | Clinical Reviewer                                       | Data Safety and Monitoring Board                                                           |
| Kathleen                          | O'Connor   |                       | EdD              |                                                        |                                          | Clinical Reviewer                                       | Data Safety and Monitoring Board                                                           |
| Olga                              | Owens      |                       | N-PC             |                                                        | Las Vegas, NV                            | Clinical Reviewer                                       | Data Safety and Monitoring Board                                                           |
